# Supplementary material for: A novel glutathione-stabilized silver–gold nano-alloy/Cu2+combination as a fluorescent switch probe forl-histidine
Source: Royal Society of Chemistry journal article supplement (doi:10.1039/c5nj01819f), 2015-01-01
Supplement: c5nj01819f1.pdf [file c5nj01819f1.pdf]

## Supplementary information

# **A novel glutathione-stabilized silver-gold nano-alloy/Cu<sup>2+</sup> combination as a fluorescent switch probe for L-histidine**

Xiaopeng Huang,<sup>a</sup> Yuejuan Lin,<sup>b</sup> Jiayang Chen,<sup>b</sup> Yaowen Chen,<sup>b</sup> Yuqin Li<sup>\*c</sup> and  
Wenhua Gao<sup>\*ab</sup>

<sup>a</sup> Department of Chemistry and Laboratory for Preparation and Application of Ordered Structural Materials of Guangdong Province, Shantou University, Shantou, Guangdong 515063, P. R. China. E-mail: [whgao@stu.edu.cn](mailto:whgao@stu.edu.cn); Fax: +86-22-82903941; Tel: +86-22-86502774

<sup>b</sup> Analysis & Testing Center, Shantou University, Shantou, Guangdong 515063, P. R. China.

<sup>c</sup> Department of Pharmacy, Taishan Medicine College, Taian, Shandong 271016, P. R. China.

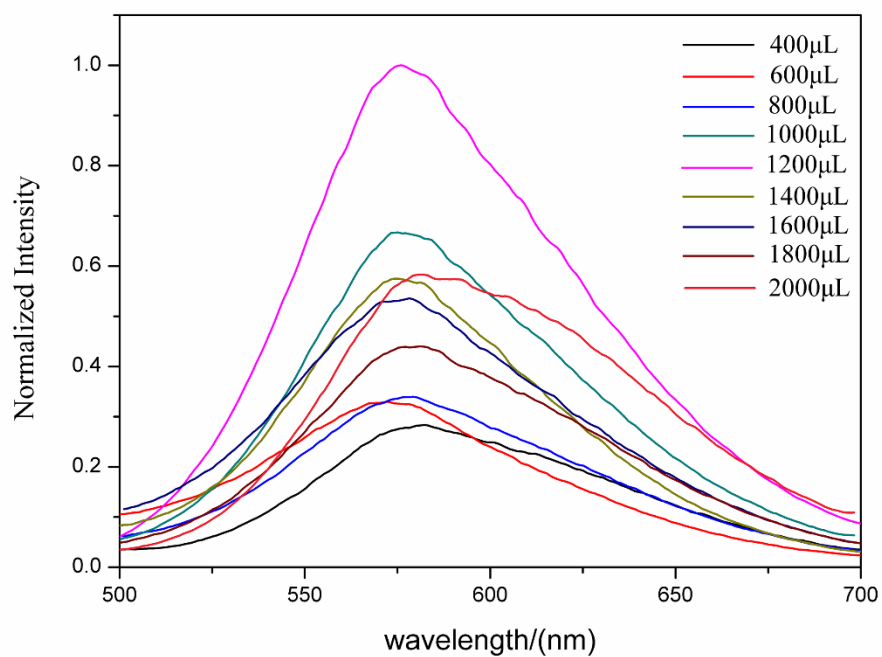

**Fig. S1** Fluorescence response of GSH-AgAuNAs with different amount of HAuCl<sub>4</sub>, showing the optimized addition amount (1.2 mL) of HAuCl<sub>4</sub>.

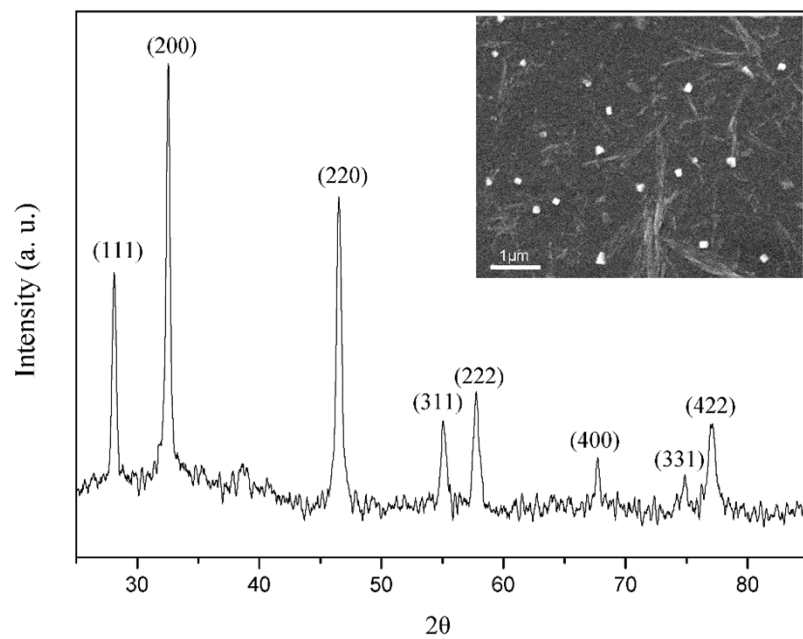

**Fig. S2** XRD pattern and SEM image of AgCl.

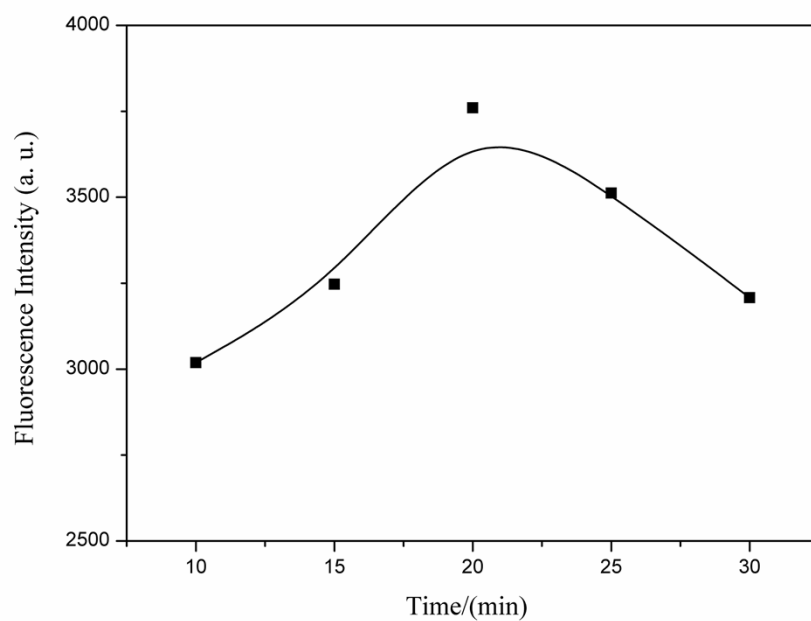

**Fig. S3** Fluorescence response of different interaction time. The concentration of L-histidine and  $\text{Cu}^{2+}$  was  $15 \mu\text{M}$  and  $10\mu\text{M}$  respectively. All experiments were carried out under pH7.40 with PBS buffer (10 mM).

**Table S1** Comparison of our proposed fluorescence probe with other assays for determination of L-histidine.

| Method                             | Linear range ( $\mu\text{M}$ ) | Detection limit ( $\mu\text{M}$ ) | Ref.             |
|------------------------------------|--------------------------------|-----------------------------------|------------------|
| Indicator-displacement assay       | 2-30                           | 0.4                               | 1                |
| DNA/ligand/ion-based ensemble      | 0-4.4                          | 0.01                              | 2                |
| Spectrophotometry                  | 5-30                           | 5.0                               | 3                |
| Fluorescence                       | 5-30                           | 5                                 | 4                |
| <b>GSH-AgAuNAs/Cu<sup>2+</sup></b> | <b>2-40</b>                    | <b>1.19</b>                       | <b>This work</b> |

## References

- 1 S. K. Sun, K. X. Tu and X. P. Yan, *Analyst*, 2012, **137**, 2124-2128.
- 2 F. Pu, Z. Z. Huang, J. S. Ren and X. G. Qu, *Anal. Chem.*, 2010, **82**, 8211-8216.
- 3 D. R. Bae, W. S. Han, J. M. Lim, S. W. Kang, J. Y. Lee, D. M. Kang and J. H. Jung, *Langmuir*, 2010, **26**, 2181-2185.
- 4 H. Huang, Y. Gao, F. Shi, G. Wang, S. M. Shah and X. Su, *Analyst*, 2012, **137**, 1481-1486.
